# Supplementary figures and images for: Early visual training and environmental adaptation for infants with visual impairment
Source: PubMed Central journal article supplement — Dev Med Child Neurol. 2021 May 4;63(10):1180–93. doi: 10.1111/dmcn.14865 (PMC8518055; doi:10.1111/dmcn.14865), 2021-05-04

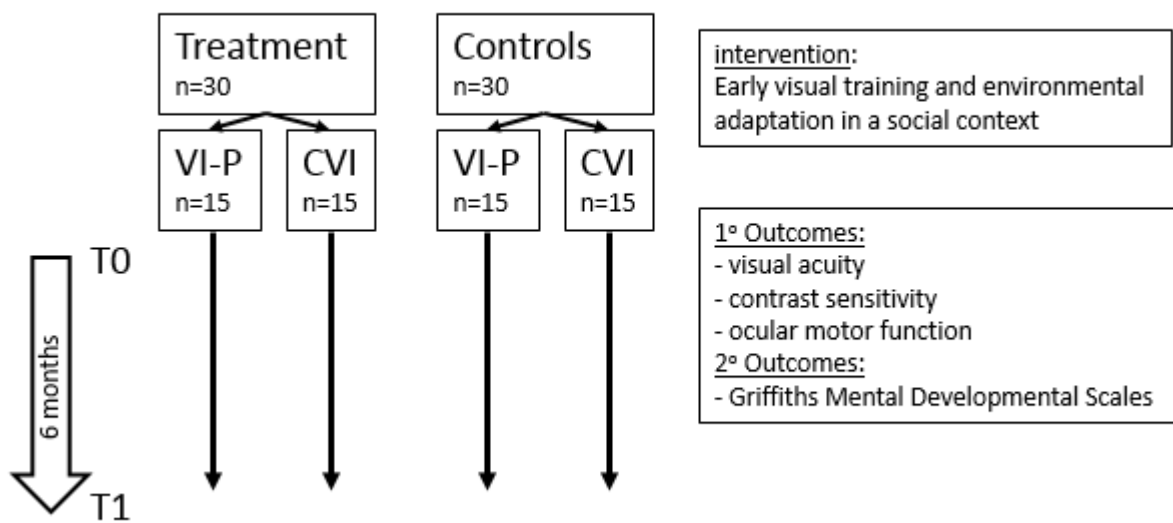

Figure S1: Flow chart of the pilot study protocol

Supplement: DMCN-63-1180-s003.pdf [file DMCN-63-1180-s003.pdf]
